# Supplementary material for: The potential crosstalk between tumor and plasma cells and its association with clinical outcome and immunotherapy response in bladder cancer
Source: J Transl Med. 2023 May 3;21:298. doi: 10.1186/s12967-023-04151-1 (PMC10155334; doi:10.1186/s12967-023-04151-1)
Supplement: Supplementary file 3 — Additional file 3: Table S2. Marker genes of six tumor cell states clusters in bladder cancer (top 100). [file 12967_2023_4151_MOESM3_ESM.xlsx]

## Sheet: Sheet1
Table S2: Marker genes of six tumor cell states clusters in bladder cancer (top 100).
	Stress	Basal	pEMT	Hypoxia	Cycle	Interferon
1	IER3	CRH	LCN15	SLC1A6	CDC20	MAGEA3
2	CXCL8	SEZ6L2	CRTAC1	SPRR3	MYBL2	GTSF1
3	FOSB	MSMB	LINC01088	BPGM	TYMS	HLA-DQA1
4	AREG	CLDN23	PLAC8	RNASE1	NDC80	KLHDC7B
5	AVPI1	RP13-270P17.3	PLA2G2A	KISS1R	CORO1A	NR2F1
6	PLAUR	IGF2	ANXA10	CLIC3	CD2	COX7B2
7	HBEGF	LCMT1	SERPINE2	CTSW	PHF19	MAGEA10
8	EMP1	RBBP6	CST1	IRS2	SPC25	RHOXF1-AS1
9	NR4A1	LINC00667	FABP4	RIMKLA	HMMR	AKR1B10
10	TM4SF1	NPPC	TRBC2	S100A9	TRAC	C6orf223
11	LYPD3	MYCL	TCN1	TTYH1	TOP2A	IDO1
12	PHLDA2	AC098973.2	REG4	C15orf48	PTPRC	LINC00470
13	SERPINB5	LY6K	TPM2	TAC3	MKI67	IGHG1
14	TRIM31	KRT20	LPXN	HILPDA	CD53	COL4A1
15	CYSTM1	PROS1	SPINK5	PVALB	BIRC5	PITX1
16	NCOA7	EMILIN2	CTSE	MYEOV	CCNA2	NKG7
17	PPP1R15A	NSMCE1	TPRG1	PLA2G2F	PTPN7	HLA-DPB1
18	ANXA1	FAM78B	TMEM45A	GDPD3	C12orf75	COL4A2
19	SLPI	ZNF812P	LOXL1	SLC6A8	CD3G	HLA-DQB1
20	CAPS	ECEL1	AC004791.2	SPRR1B	LCK	TENM1
21	SFN	KIAA0556	CXCL10	LINC01481	MND1	XX-CR54.1
22	LMNA	NRN1	SULT1C2	FCHSD2	CD3E	IGLC3
23	OVOL1	ZNF224	GDA	PARD6G-AS1	HJURP	HLA-DOA
24	EPHA2	SOCS2	CD36	ERO1A	CENPA	RP11-284G10.1
25	MIR22HG	LY6D	AKAP7	FCRLB	RRM2	IGLC2
26	KRT17	TSHZ2	TACC3	RP4-737E23.2	CENPF	IGHA1
27	C19orf33	PEG10	FKBP10	YEATS4	CDKN3	CIITA
28	GPRC5A	ZNF576	CRYL1	SMOC1	ASPM	ERAP2
29	C9orf16	CTD-2314B22.1	CRCT1	ZNF114	SASH3	IGHG3
30	FOSL1	RP11-89K21.1	TOX3	EGLN3	LCP1	LINC01268
31	OLFM4	TPM1	FPR3	GJB6	SIT1	ZNF608
32	PCP4L1	USP14	B3GALNT1	NDRG1	UBE2C	HLA-DRB1
33	CLDN4	TNFSF10	CCRL2	RAB3IP	CDT1	VWF
34	AGR3	NNT-AS1	CALML3	PRSS27	CD3D	HLA-DPA1
35	KLF4	YES1	LAPTM5	MAL	SPOCK2	KRT15
36	TFPI2	PLBD1	IVL	ANGPTL4	GIMAP7	AC004510.3
37	CLDN1	RP11-672L10.6	TFPI	MMEL1	FYB	RP11-30J20.1
38	DUSP1	SCGB3A1	LINC01612	FRS2	CDCA3	MYLK4
39	SEPP1	DLGAP1	NEFM	SFTA2	IL2RG	IGLV2-14
40	KDM6B	THBS2	ADGRV1	BASP1	SPN	SLCO1B3
41	CD47	FOXL2	PYGL	HK2	CDCA7	RP11-11N9.4
42	PLK3	RP11-390E23.6	ENTPD3	FAM118A	IKZF1	PCDH11X
43	SOCS3	TNRC6A	GSTM3	GUCA2A	TBC1D10C	HLA-DMB
44	GADD45B	ENOSF1	LINC01468	RARRES1	ADAM19	AC131056.5
45	RAB11FIP1	TSPAN33	TSPAN8	RP11-841O20.2	TPX2	IGHG2
46	DNAJA1	ANO10	CA9	ENO2	SH2D1A	UBD
47	PRAC1	RP4-665J23.1	KCNT2	ALDOC	IL2RB	RP11-608O21.1
48	MAFF	TSPYL5	CECR1	SPINK1	DEPDC1	SMCR5
49	ETS2	IGF2BP2	NEFL	TNNT1	GYPC	NR2F1-AS1
50	ZC3H12A	GTF3C1	PTHLH	EEF1A2	SELL	HIST1H4J
51	PMAIP1	LDOC1	TRNP1	HIST3H2A	SELPLG	FUT6
52	SOX15	LINC00665	PIFO	CNOT2	WAS	TPSB2
53	LAMB3	MFAP2	CXCL11	FAM210A	GNG2	GRIN2D
54	PPP1R1B	RP11-758M4.4	DGAT2	PPP1R14D	MFNG	JCHAIN
55	GPX2	CTD-3203P2.3	TMEM91	CASP14	CD52	TYROBP
56	ANXA2	PYCR1	ZNF175	SLCO4A1	TRBC1	NRP1
57	LGALS4	RABAC1	GSTM1	PRSS8	APBB1IP	TPTE
58	SERTAD1	BST1	HSD17B2	IFITM10	CCNB1	STARD4
59	MALL	ZNF428	SPON1	LGALS1	CD6	PPP1R14A
60	HERPUD1	CMTM3	NT5E	SLC39A2	CD28	HLA-DRA
61	CDKN1A	RPRM	CCL27	PGF	CLSPN	CYP4F3
62	CEBPB	CIDEA	SERPIND1	IGFL1	S1PR4	GPR158
63	EIF4A3	CDIPT	CENPP	VGLL1	ZAP70	GZMB
64	SNCG	FOXF2	GPNMB	SCD	CD247	IGKV3-20
65	SEPW1	RP11-347P5.1	KIT	TNNC1	CXCR3	CCL5
66	UBC	LSM8	C16orf54	NDRG2	IL2RA	GPX8
67	TUBB4B	TMEM41A	IL33	MESP1	SGOL1	NEXN
68	CLEC2B	BEX2	PNCK	SLC35E3	ITGB2	GZMA
69	HSPB1	PDCD5	SLC8A1-AS1	RALBP1	LAT	IGLV2-11
70	TRAF4	IGFBP5	DUSP27	TFF2	WIPF1	GABRB2
71	TOB1	CAV1	HEY1	PRSS3	E2F2	ATP10B
72	PLAT	AC245100.1	FGD5	CCT2	SPC24	ST8SIA6-AS1
73	LITAF	SGCE	SLC2A8	BNIP3L	NCAPH	NLGN4X
74	SOD2	SCG5	DFNA5	SLC2A1	CCNB2	RP11-575F12.3
75	LIPH	AC010649.1	EML6	RP11-61L19.2	BUB1	IGKV4-1
76	RHOV	ZNF677	SYT10	UPK2	ICOS	HLA-DRB5
77	LGALS3	IQCA1	XG	HOPX	ANXA6	AL354822.1
78	CFD	PODXL2	SULT1A2	MACROD2	PTTG1	DNAH11
79	NFKBIA	TMEM163	EPB41L3	ENGASE	SLA	NOS2
80	SDCBP2	CTSZ	RP11-511B23.2	FUT3	GTSE1	TMTC1
81	ANXA11	PAIP1	S100A13	MAP7D2	DOK2	IGHG4
82	CRACR2B	PYCARD	CYP2J2	CDKN2C	MAD2L1	ZNF552
83	ZFP36	LYPD6B	TMEM141	RNASE7	ITM2A	PLVAP
84	BAIAP2	ABCA8	FHAD1	DUSP9	GINS2	GZMH
85	SYT8	SMCHD1	PPP1R3C	TGM2	RCSD1	ETV1
86	DENND2C	TAF10	PKIB	IFIT2	TNFRSF4	TP53INP1
87	EZR	LTBP1	LAYN	TRIB3	CENPW	MKRN3
88	HSPB8	BRDT	FO538757.2	KRT33B	LTB	RP4-548D19.3
89	PVRL2	ADCK2	FOXL1	UBXN10-AS1	FOXM1	TERT
90	S100A16	ARL4C	CBLN2	S100A4	KIAA0101	DTNA
91	LIMA1	EXOSC5	SLITRK6	NOL3	TRAT1	GABRG2
92	PRSS22	ASPHD1	P3H2	PFKFB4	CD38	FAT1
93	ERRFI1	IRGQ	TESC	CCND1	AC133644.2	RP11-456O19.2
94	ODC1	BCL7C	CXCL14	SYDE1	SGOL2	CTD-2269F5.1
95	BAG1	POLR2J3	PKIA	SMIM24	RASGRP2	AMY2B
96	RNF39	ZNF439	FRMD3	SUSD2	VIM	RP11-219A15.1
97	GDF15	TFCP2L1	PM20D1	EMX2	LCP2	CCL4
98	FAM3D	LINC01006	OSR1	SLC16A3	CEP55	RIMS2
99	IGFBP2	ARL13B	AC016735.2	TMEM97	AURKB	CNTNAP4
100	CRIP2	LINC00958	GOLT1A	AC006262.5	POC1A	IGFBP6
